# Supplementary material
Source: PubMed Central journal article supplement (PMC3811250)
Supplement: AAC.00687-13_zac010132259so1.pdf [file AAC.00687-13_zac010132259so1.pdf]

**Table S1. Primer pairs used to estimate copy number of a chromosome 5 region ('X5r' spanning PF3D7\_0519900 to PF3D7\_0521500) in Cambodian *P. falciparum* isolates.**

| qPCR primers                              |                             |                                |
|-------------------------------------------|-----------------------------|--------------------------------|
| Gene ID                                   | Forward                     | Reward                         |
| PF3D7_0519900                             | TGTACAATCCATACGACATAAG      | GGATCCGGGTATATTTTCATCTGTAG     |
| PF3D7_0520100                             | CATAAGCCCAATGATCCTAAAGAGA   | AGCATTTCCTTAACACGATAAACA       |
| PF3D7_0520300                             | GTTAGAGGATCTGTAGTTAGATATG   | TGCTTCTGTCTGCACAT              |
| PF3D7_0520500                             | CGGAAGTCTGTTAAATGTTGTGCAGC  | GGAACGGGATGTACTTTATCAACAGC     |
| PF3D7_0520600                             | AGAGACCACGTATTATTTGGCTATG   | ACTTATAATCCGTGTGTTTCATCAG      |
| PF3D7_0520700                             | GATGACGTAGAAATGGAAAGTGAC    | CGTCAGTATAATTATGTGTATCCTC      |
| PF3D7_0520900                             | GGAGCTCAGATTAGGTGGTGTTC     | GGCACTTTCAACACACCACCAGTA       |
| PF3D7_0521000                             | GGGAGAATGACTTATGGAGGGA      | CGTCAACTGAGAGTGAAGATGACGA      |
| PF3D7_0521100                             | ACCGTTGTCTATAATAAGGCTACGAAC | CAGCCGAAGTAAAGAATGTCAATCC      |
| PF3D7_0521300                             | AGACACATTCACACAAAGTAATAGCG  | GGGAATACACAAATTCAACTAATAACCGGA |
| PF3D7_0521500                             | TGGCTCAGGTATGATTGGAGGAGT    | CATCTGCTCCAGCCAAATCGTCAT       |
| PF3D7_1324900<br>( <i>pfl</i> <i>dh</i> ) | AGGACAATATGGCACTCCGAT       | TTTCAGCTATGGCTTCATCAAA         |

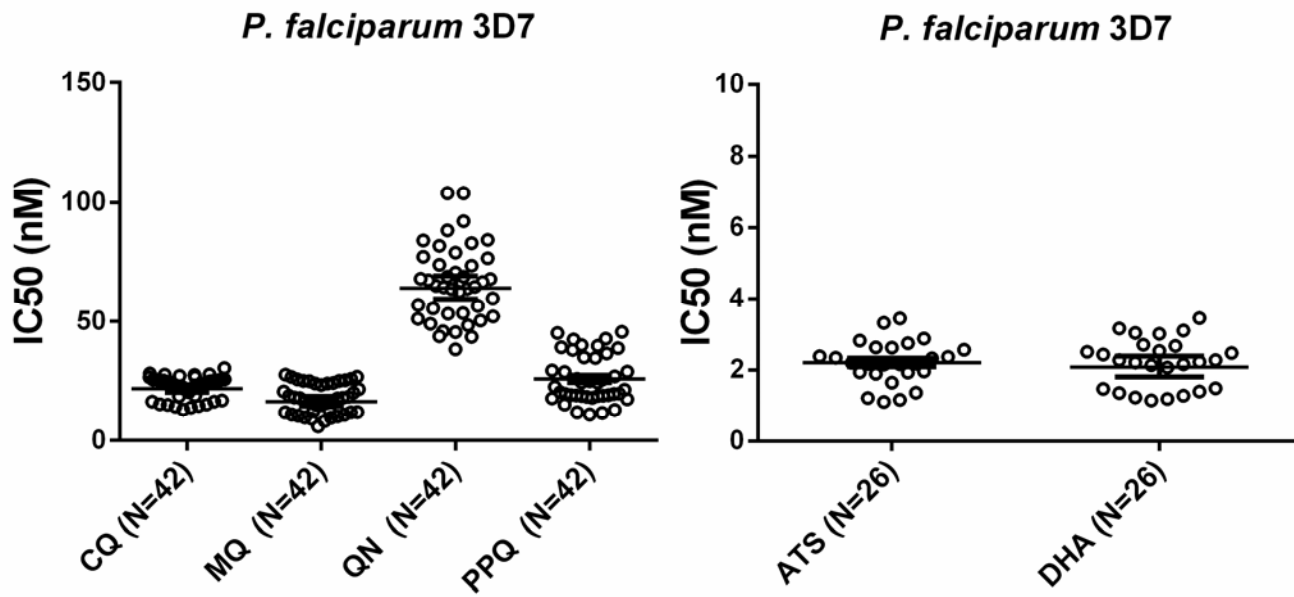

**Figure S1.** *In vitro* susceptibility of the *P. falciparum* 3D7 line to six antimalarial drugs.

The geometric mean IC<sub>50</sub>s (in nM) and 95% CIs are shown by the horizontal line and whiskers.
